# Supplementary material for: Hydration and cooling in elite athletes: relationship with performance, body mass loss and body temperatures during the Doha 2019 IAAF World Athletics Championships
Source: PubMed Central journal article supplement — Br J Sports Med. 2021 Feb 12;55(23):1335–41. doi: 10.1136/bjsports-2020-103613 (PMC8606454; doi:10.1136/bjsports-2020-103613), 2021-02-12

**Beat the heat** IAAF World Athletics Championships Doha 2019 Questionnaire **English**

Name: \_\_\_\_\_ Date: \_\_\_\_ / \_\_\_\_ / 2019 Gender: M / F, Height: \_\_\_\_\_ cm,  
Body mass: \_\_\_\_\_ kg, Age: \_\_\_\_\_ yrs National team: \_\_\_\_\_

**8. How much fluid do you plan on consuming during your event?**

None  Less than 0.5L  0.5 to 1L  1 to 1.5 L  1.5 to 2 L  More than 2 L

**Including:**  Water  Electrolytes  Carbohydrates  Ice-slurry  Other: \_\_\_\_\_

**9. How did you establish this amount?**

personal experience  fluid availability  coach recommendation  nutritionist recommendation

sports scientist recommendation  personal reading  other: \_\_\_\_\_

**10. What precooling method(s) do you plan on using before your event?**

None  Fanning  Cold towel  Ice vest  Neck collar  Whole-body cold water immersion

Leg only cold water immersion  Ice-slurry ingestion  Menthol mouth rinse  Other menthol applications

Other: \_\_\_\_\_

**11. What mid-cooling (within race cooling, also known as per-cooling) method(s) do you plan to use during the race?**

None  Ice slurry ingestion  Cold water ingestion  Head or face cooling via water dousing

Menthol mouth rinse  Other menthol applications  Other: \_\_\_\_\_

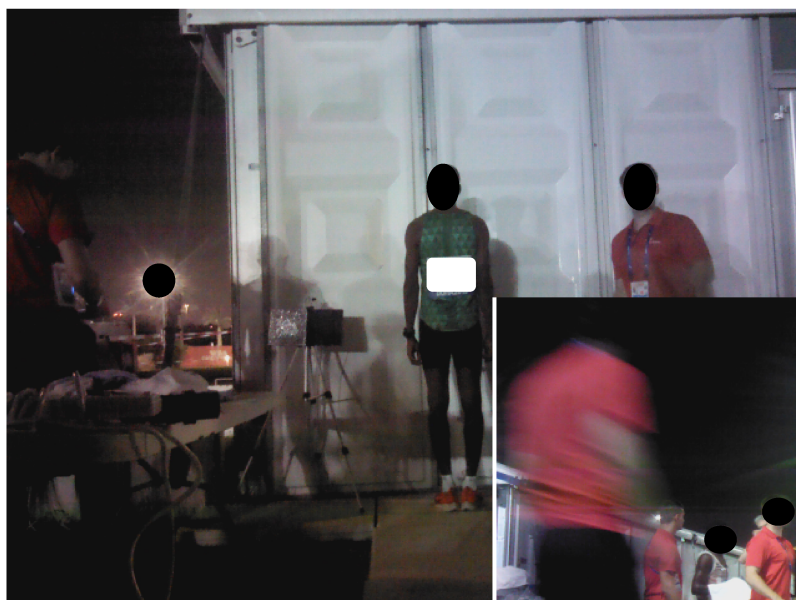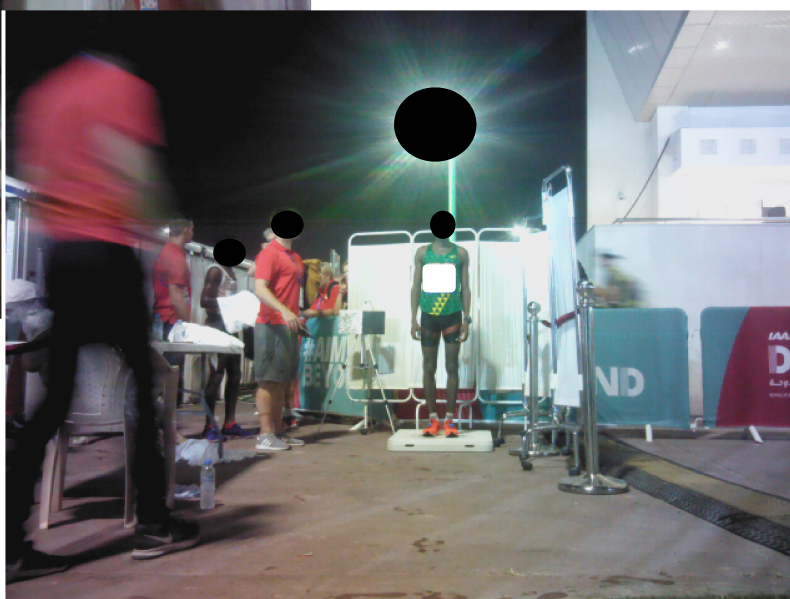

Supplement: bjsports-2020-103613supp001.pdf [file bjsports-2020-103613supp001.pdf]
